# Supplementary material
Source: PubMed Central journal article supplement (PMC4319421)
Supplement: JCI79220sd.pdf [file JCI79220sd.pdf]

**Table S1. qPCR primer list.**

| Genes  | Forward primer            | Reverse primer           |
|--------|---------------------------|--------------------------|
| NANOG  | ACAACCTGGCCGAAGAATAGCA    | GGTCCCAGTCGGGTTTAC       |
| PAX6   | TCTTTGCTTGGGAAATCCG       | CTGCCCGTTCAACATCCTTAG    |
| ASCL1  | CAACGCCACTGACAAGAAAG      | GGAGCTTCTCGACTTCACCA     |
| NHLH2  | GTCCGGACTCAGCATCATTT      | ATATTTTCCGGAATCTCCCCT    |
| NKX2.1 | AACCAAGCGCATCCAATCTCAAGG  | TGTGCCCAGAGTGAAGTTTGGTCT |
| OTP    | GGAACACGTTGGTCGTCTTT      | TTCGCCAAGACTCACTACCC     |
| SIM1   | CTTTCTGTGTGAAATCCCGAA     | CCCACCATGACTGACAACAG     |
| SF1    | CCTCGCTATTGTAGATGGGC      | GACCTGACTCGTAAACTGCG     |
| NESTIN | GGCGCACCTCAAGATGTCC       | CTTGGGGTCTGAAAGCTG       |
| POMC   | GACTGCTGCTCTCCAG          | AGCAGCCTCCGAGACA         |
| AGRP   | GGATCTGTTGCAGGAGGCTCAG    | TGAAGAAGCGGCAGTAGCACGT   |
| NPY    | GGTCTTCAAGCCGAGTTCTG      | AACCTCATCACCAGGCAGAG     |
| LEPR   | ATGTTCCGAACCCCAAGAAT      | GGACCACATGTCACTGATGC     |
| SST    | CCAGACTCCGTCAGTTTCTGCA    | TTCCAGGGCATCATTCTCCGTC   |
| PMCH   | ATTGGGGATGAAGAAAACCTCAGCT | GACTTGCCAACAAGGTCGGTAG   |
| PCSK1  | ACCAGGTGCTGCATATCTCG      | CACAATGACTGCACGGAGAC     |
| PCSK2  | TTTCGGTCAAATCCTTCCTG      | TGCAAAGGCCAAGAGAAGAC     |
| CPE    | TAAATTCAGGCTCACCAGGC      | CCATCAGCAGGATTTACACG     |
| MC2R   | CAGTAGGGGTTACTTGGGCA      | CCATCACACTGACCATCCTG     |
| MC3R   | GGCTTGATGAAGACCTGCTC      | TCAGCCAACACTGCCTAATG     |
| MC4R   | CTTATGATGATCCCAACCCG      | GTAGCTCCTTGCTTGCATCC     |
| OPRM1  | TGGTGGCAGTCTTCATCTTG      | GATCATGGCCCTCTACTCCA     |
| OPRD1  | GTAGATGTTGGTGGCCGTCT      | ATCACCGCGCTCTACTCG       |
| TBP    | AACAACAGCCTGCCACCTTA      | GCCATAAGGCATCATTGGAC     |
| B2M    | TAGCTGTGCTCGGGCTACT       | TCTCTGCTGGATGACGCG       |

**Table S2. List of primary Abs and their concentrations and sources used in this study.**

| Antibody          | Species | Dilution        | Source                     | Catalog No. |
|-------------------|---------|-----------------|----------------------------|-------------|
| $\alpha$ MSH      | Sheep   | 1:1000          | Millipore                  | AB5087      |
| POMC              | chicken | 1:500           | Abcam                      | ab14064     |
| NPY               | Rabbit  | 1:1500          | Novus                      | npb1-19808  |
| Somatostatin      | Rat     | 1:500           | Abcam                      | ab30788     |
| MCH               | Rabbit  | 1:500           | Sigma                      | M8440       |
| AGRP              | Rabbit  | 1:200           | Phoenix<br>Pharmaceuticals | H-003-53    |
| AGRP              | Goat    | 1:500           | Neuromics                  | GT15023     |
| TH                | Rabbit  | 1:500           | Abcam                      | ab76013     |
| GABA              | Rabbit  | 1:500           | Sigma                      | A2052       |
| GAD67             | Mouse   | 1:500           | Millipore                  | MAB5406     |
| Mash1             | Rabbit  | 1:200 WB 1:500  | Abcam                      | ab74065     |
| Pax6              | Rabbit  | 1:100 WB 1:500  | Covance                    | PRB-278P    |
| Nkx2.1(TTF1)      | Rabbit  | 1:200 WB 1:1000 | Abcam                      | ab76013     |
| FoxG1             | Rabbit  | 1:200           | Abcam                      | ab18259     |
| Sox1              | Goat    | 1:500           | R&D                        | AF3369      |
| Nestin            | Mouse   | 1:500           | Stemgent                   | 09-0045     |
| $\beta$ endorphin | Rabbit  | 1:200           | From Sharon Wardlaw        |             |
| CPE               | Goat    | 1:300           | R&D                        | AF3587      |
| MAP2              | Chicken | 1:10,000        | Abcam                      | AB5392      |
| Tra-1-60          | Mouse   | 1:300           | Millipore                  | MAB4360     |
| Tra-1-81          | Mouse   | 1:300           | Millipore                  | MAB4381     |
| Nanog             | Goat    | 1:500           | R&D Systems                | AF1997      |
| Sox2              | Rabbit  | 1:500           | Stemgent                   | 09-0024     |
| Oct4              | Rabbit  | 1:500           | Stemgent                   | 09-0023     |
| SSEA4             | Mouse   | 1:300           | R&D Systems                | MAB1435     |
| p-STAT3           | Mouse   | 1:200 WB 1:1000 | Cell signaling             | 4113        |
| p-STAT3           | Rabbit  | 1:200 WB 1:1000 | Cell signaling             | 9145        |
| p-AKT(T308)       | Rabbit  | WB 1:1000       | Cell signaling             | 9275        |
| p-AKT(S473)       | Rabbit  | WB 1:1000       | Cell signaling             | 4060        |
| C-FOS             | Rabbit  | 1:200           | Cell signaling             | 2250        |
| STAT3             | Rabbit  | WB 1:1000       | Cell signaling             | 12640       |
| AKT               | Rabbit  | WB 1:1000       | Cell signaling             | 9272        |
| ACTIN             | Rabbit  | WB 1:1000       | Cell signaling             | 8457        |

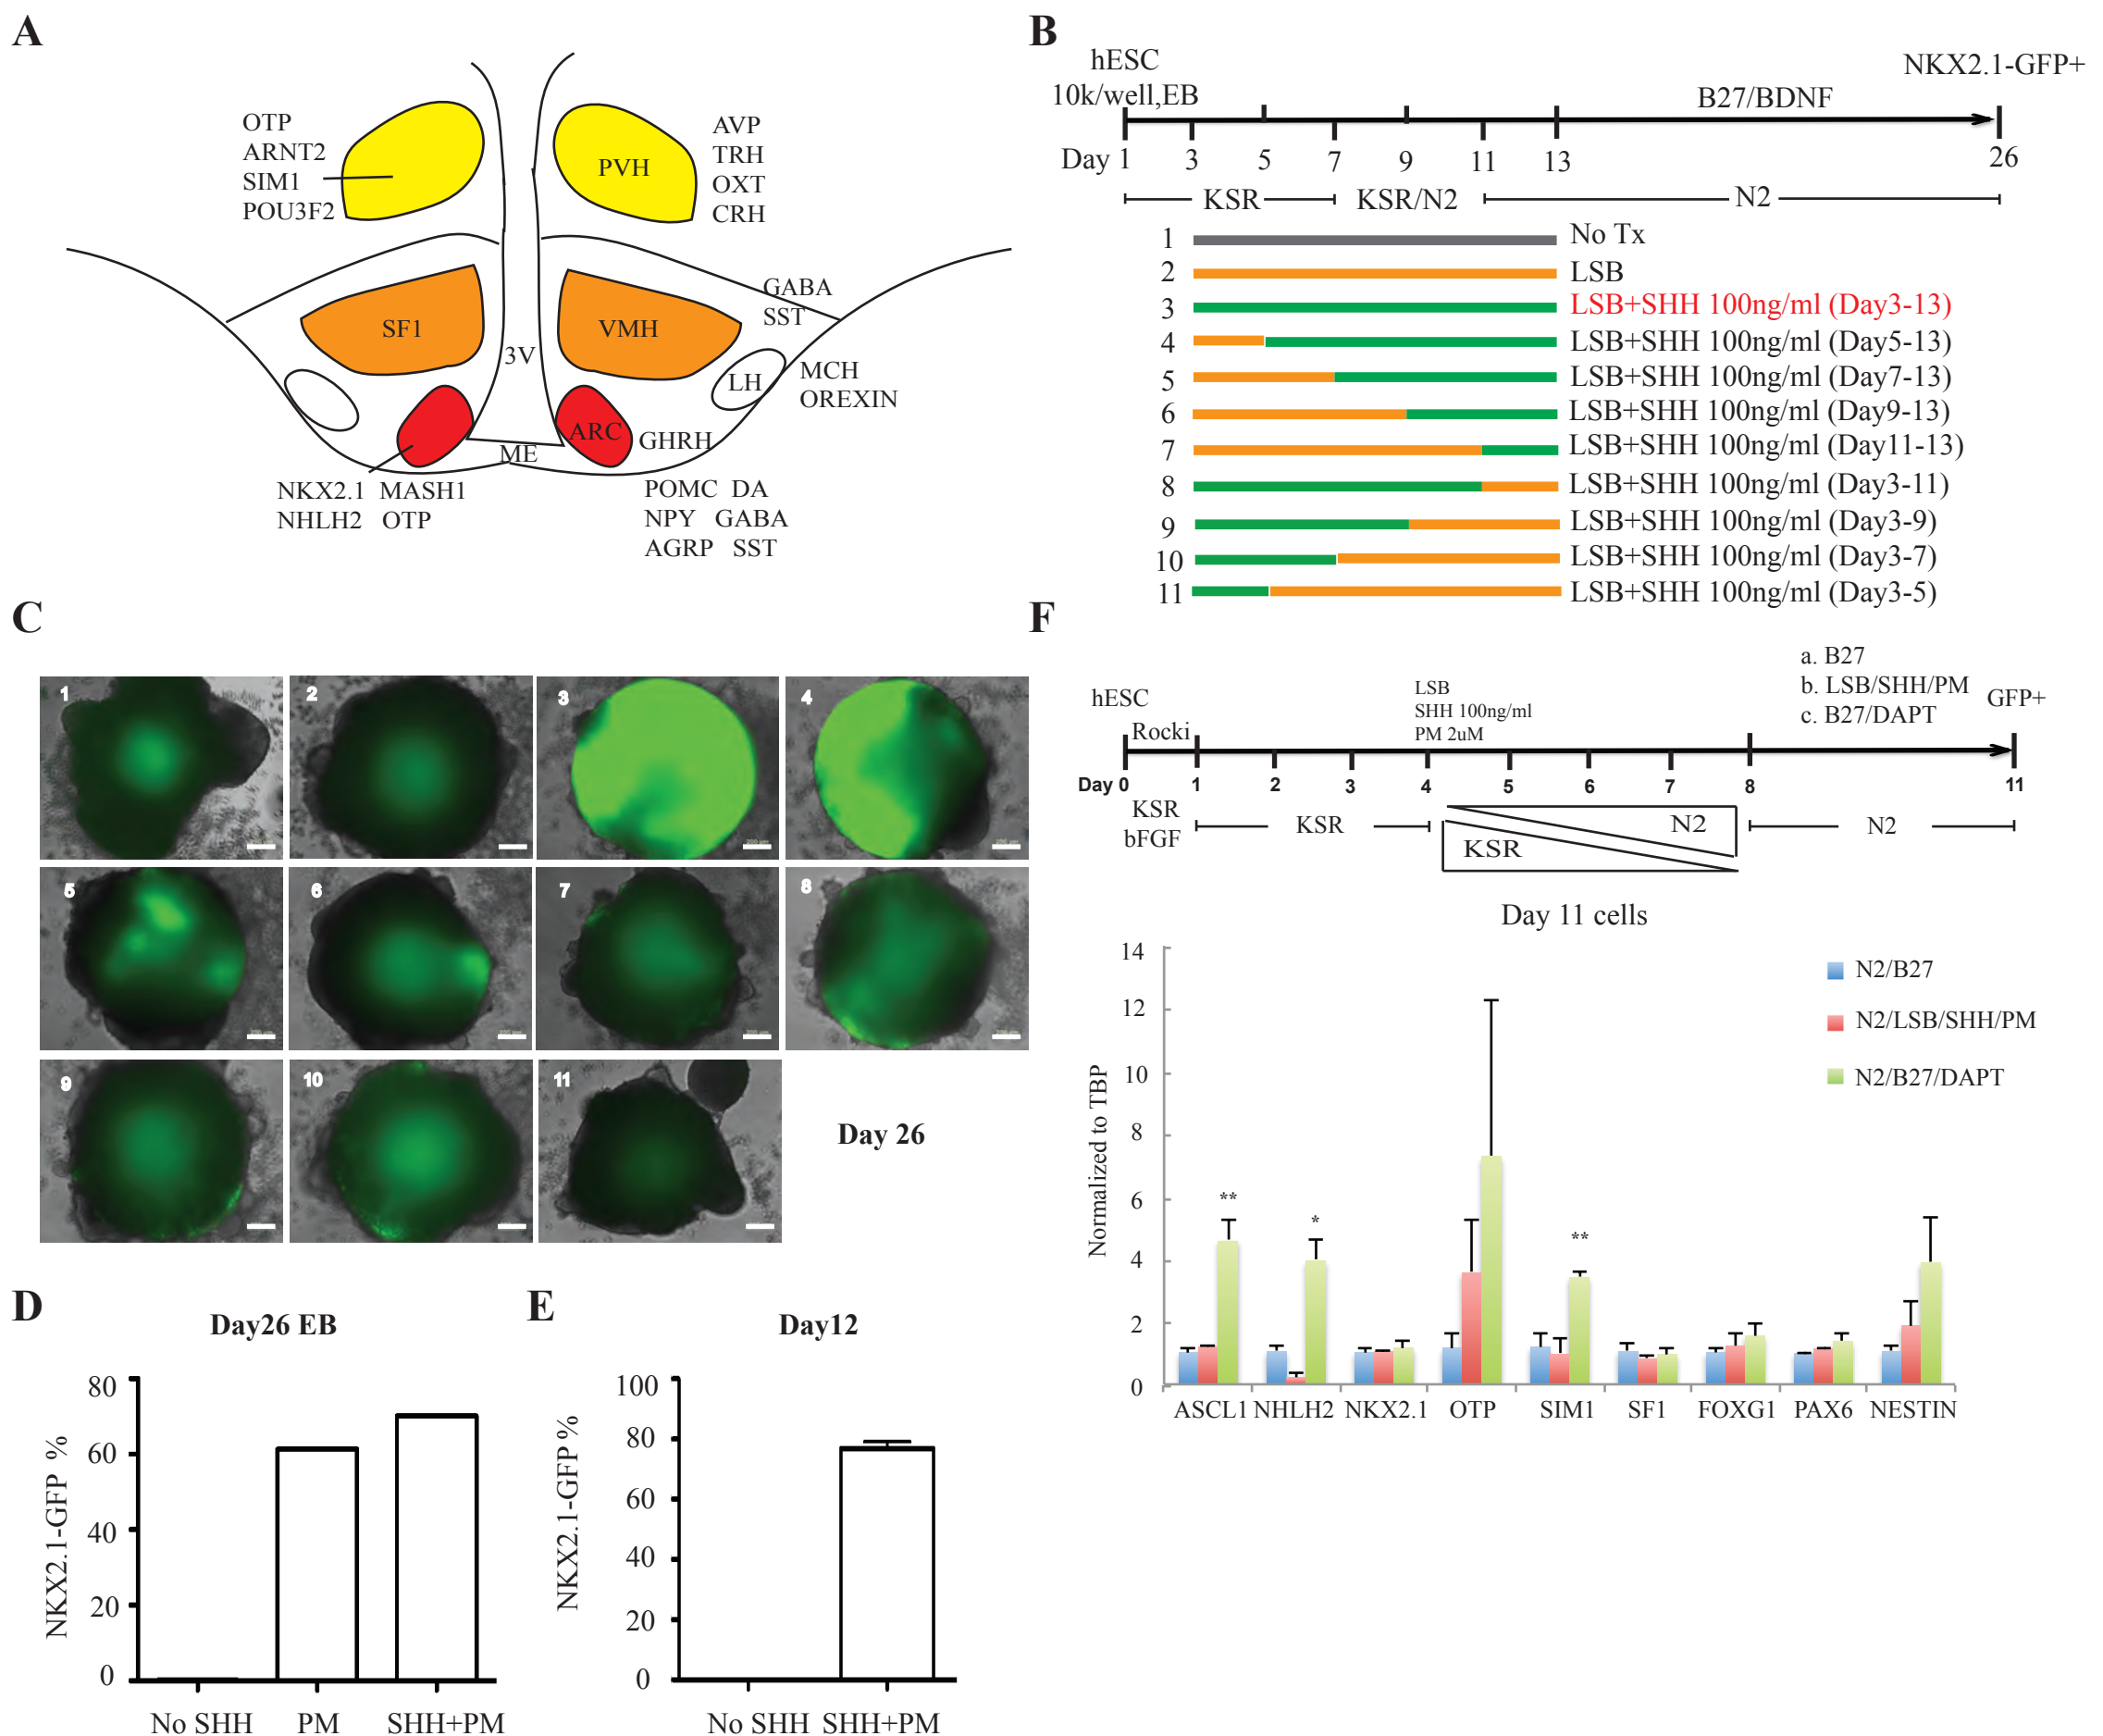

**Figure S1. Early activation of SHH signaling and subsequent inhibition of Notch signaling induces the production of hypothalamic NKX2.1 progenitors.** (A) Illustration of the adult medial hypothalamus with region-related gene expression of hypothalamic markers based on published data(1, 16-21). ARC: arcuate nucleus, VMN: ventromedial nucleus, PVN: paraventricular nucleus, LH: lateral hypothalamus, ME: median eminence. Markers on the left indicate the transcription factors expressed while markers on the right display the gene expressed in specific hypothalamic nuclei; (B-C) The timing of SHH influences the expression of NKX2.1-GFP in day 26 differentiated EBs. 11 conditions and 9 timings of SHH were indicated in B while the actual expression of NKX2.1-GFP were shown in B for each condit; (D-E) FACS analysis of the percentage of NKX2.1-GFP cells in day 26 EBs treated with no SHH, 2uM Purmorphamine (PM) and SHH 100ng/ml + 2uM PM from days 3 to 13 (D) and day 12 cells. N=1 for each bar; (E) from monolayer feeder-free differentiation with (n=3) or without (n=1) SHH 100ng/ml + 2uM PM (from days 1-8). LSB were used in both cases; (F) qPCR of transcription factor genes in day 11 cells from three conditions (only differ from day 8 to day 11). N=3 for each bar.

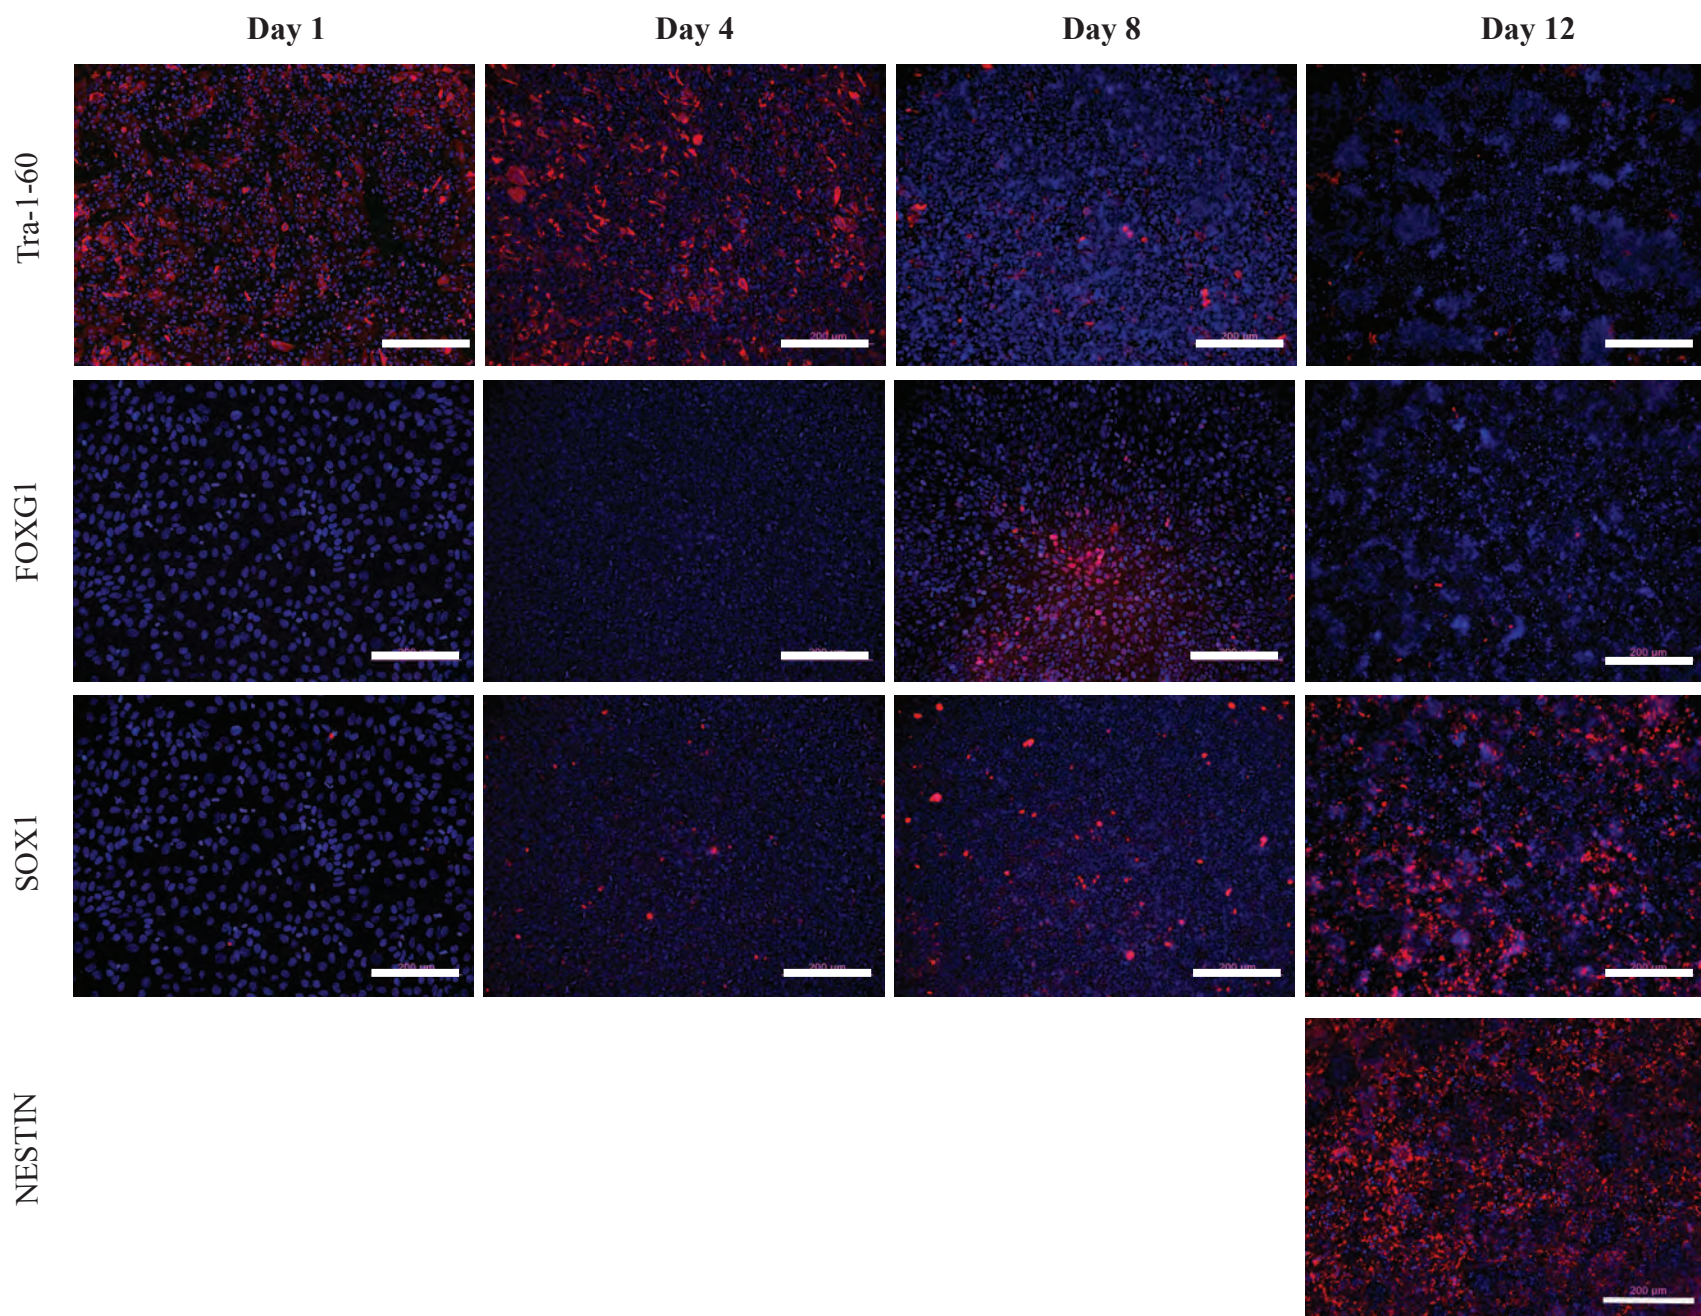

**Figure S2. Temporal expression of transcription factors in early hypothalamic neuron induction and patterning.**

Immunocytochemical analysis of neuron progenitor markers and stem cell marker in cells of 1, 4, 8 and 12 days of differentiation. Tra-1-60 is a pluripotency marker. FOXG1 is a telencephalon progenitor markers. SOX1 and NESTIN are general markers for neuron progenitors. Scale bar, 200 $\mu$ m.

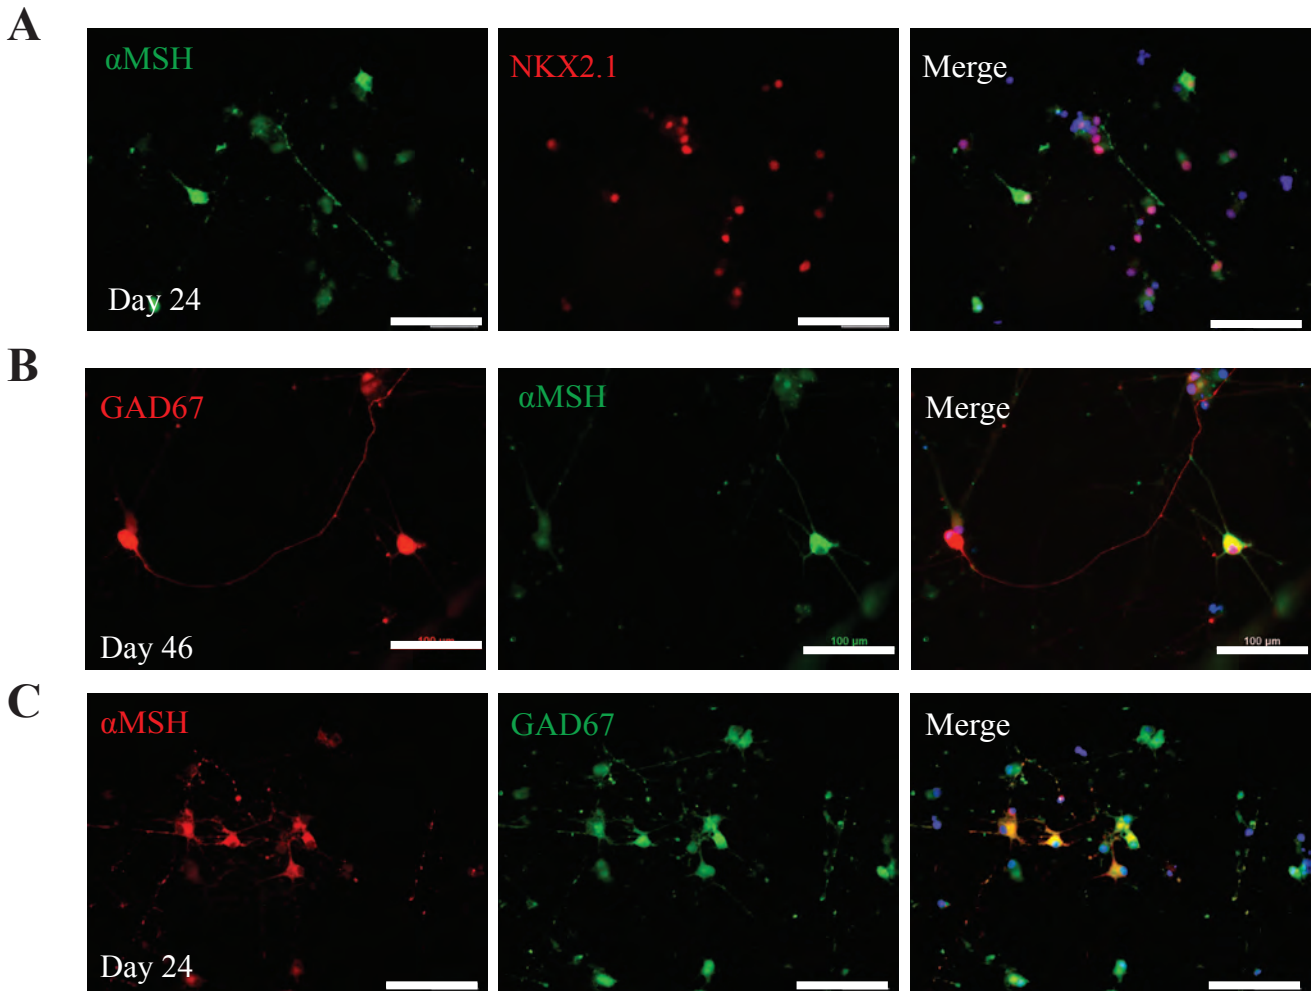

**Figure S3. hESC-derived neurons express hypothalamic neuron markers.**

(A) Immunocytochemical analysis of day 24 differentiated neurons with alphaMSH and NKX2.1; (B) Immunostaining of day 46 neurons with  $\alpha$ MSH and GABA; (C) Immunocytochemical analysis of day 24 neurons with alphaMSH and GAD67. Scale bar, 100 $\mu$ m.

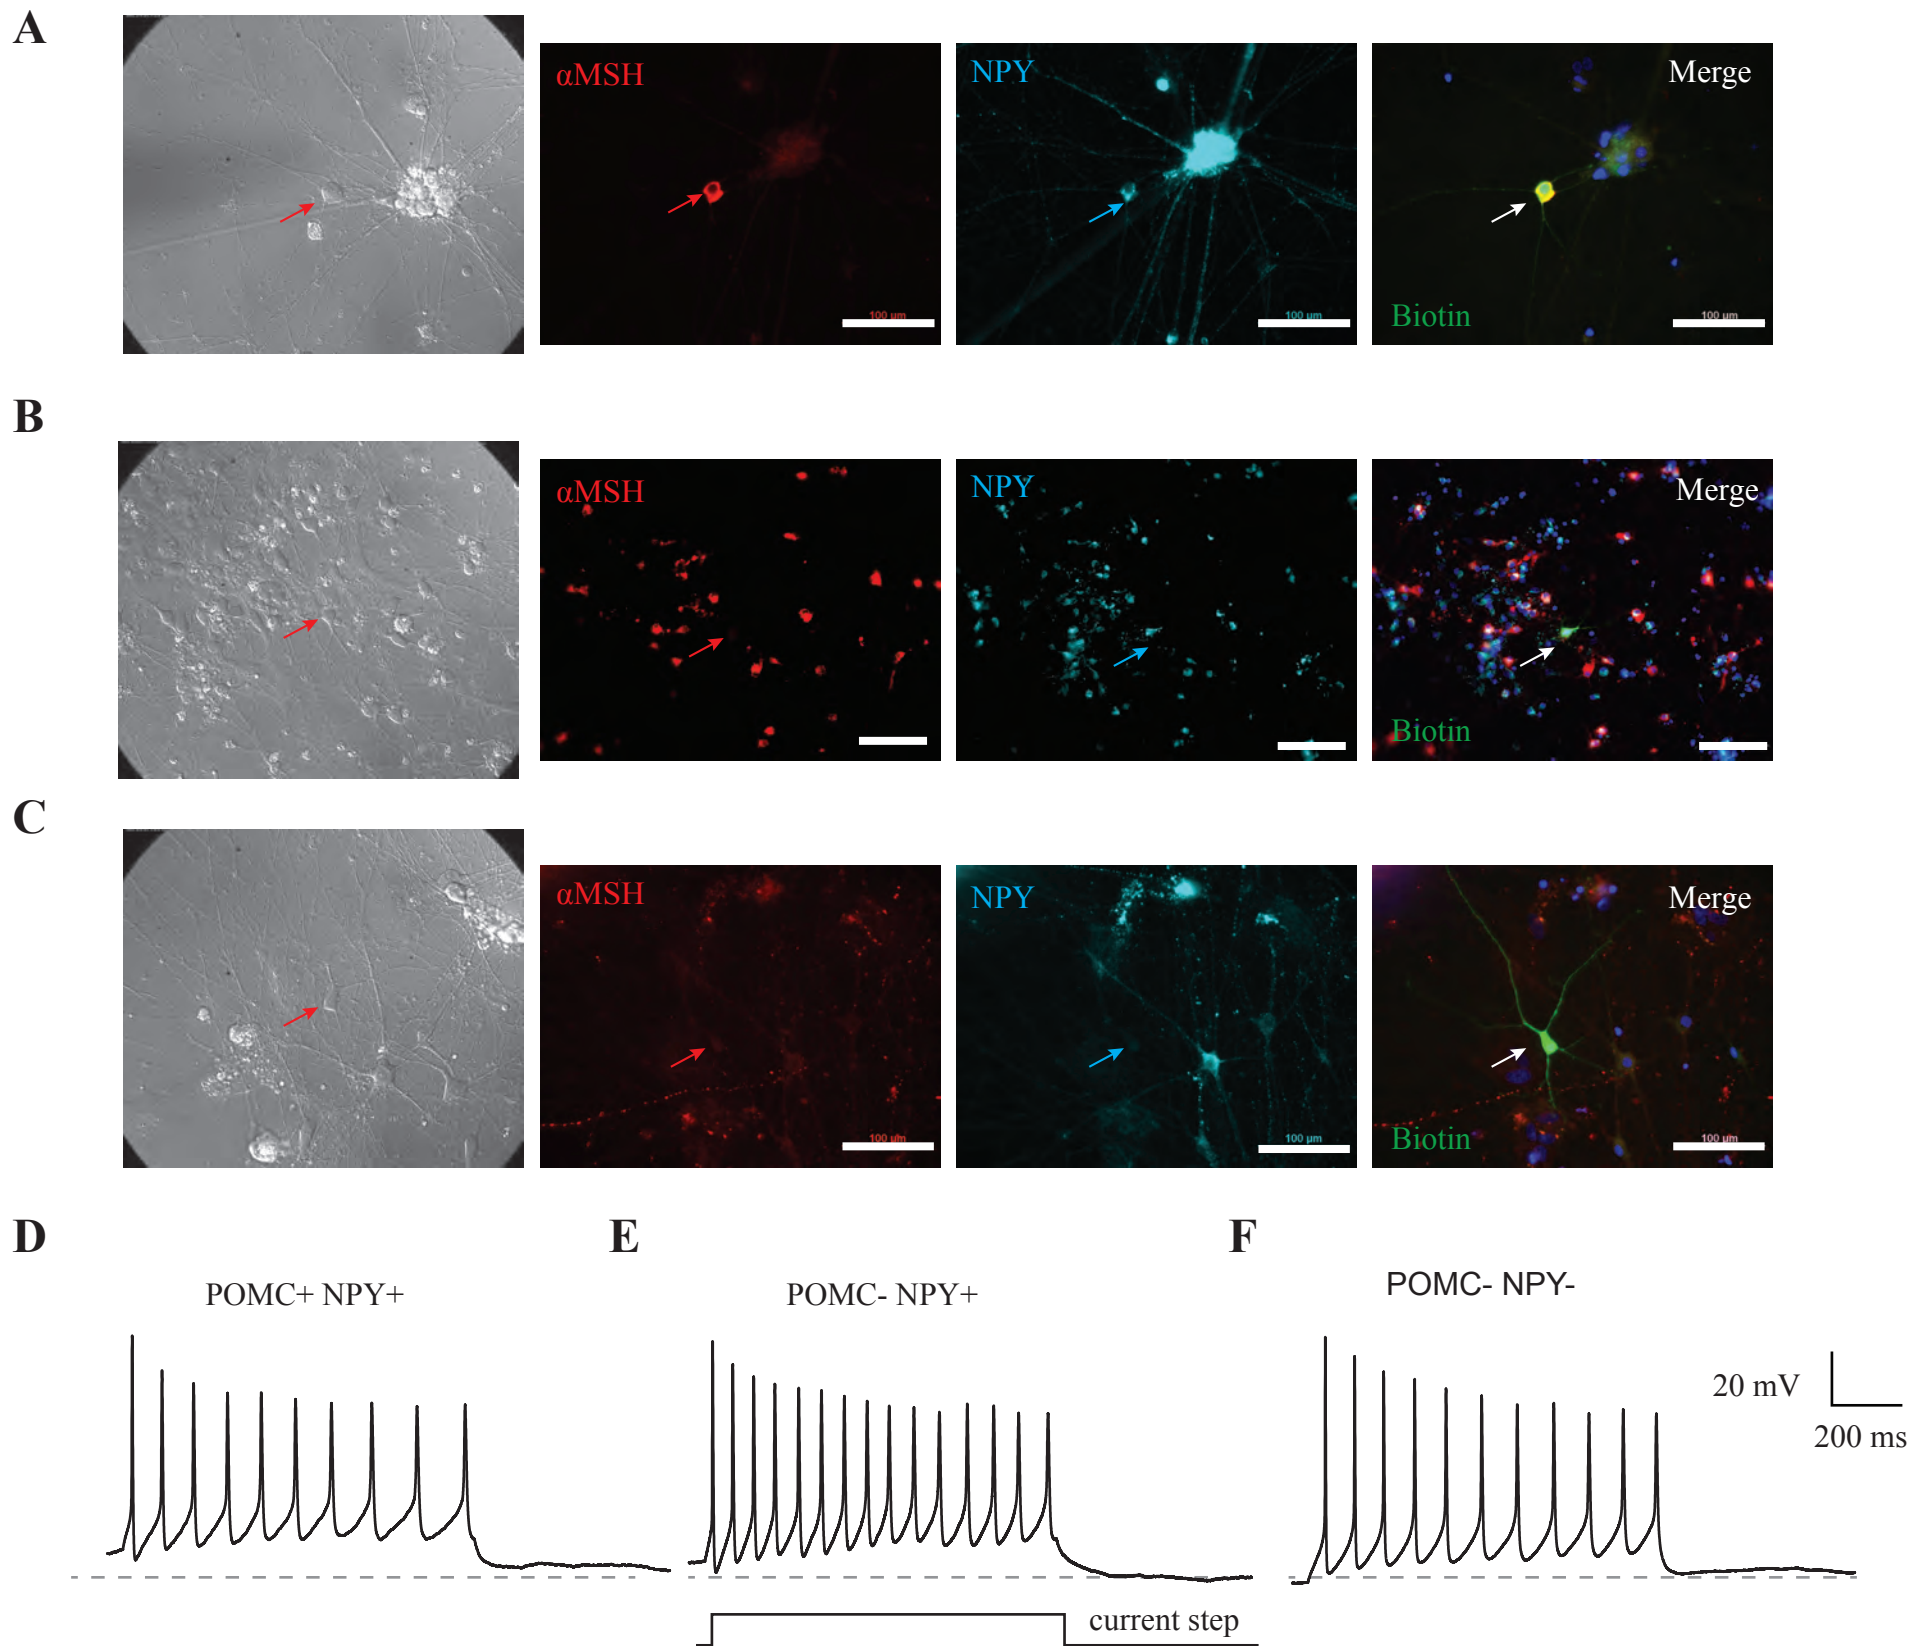

**Figure S4. Neurons made from hypothalamic NKX2.1+ cells fire action potentials.**

Representative current clamp recordings and post hoc identification of POMC+ or NPY+ neurons (days 24 to 33). After recording, cultures were fixed and stained for  $\alpha$ MSH, NPY and recorded cells (biotin+) cells identified with streptavidin-alexa-488.(A) POMC+NPY+; (B) POMC-NPY+; (C) POMC-NPY- neurons. Left column of images: DIC image (40x) of live cells prior to recording. Arrows indicate the recorded neurons. Scale bar, 100 $\mu$ m; (D-F) Action potential firing in the neurons identified in (A–C). Membrane potential traces in response to a 1s current step, as shown under trace (E), were recorded. The amplitude of the current step was dependent on the individual cell. (D) POMC+NPY+ (neuron in A), (E) POMC- NPY+ (neuron in B), (F) POMC-NPY- (neuron in C). Dashed lined = -60 mV. Total number of identified cells recorded: POMC+NPY+ N= 3, POMC-NPY+ N= 2, POMC-NPY- N= 4.

A

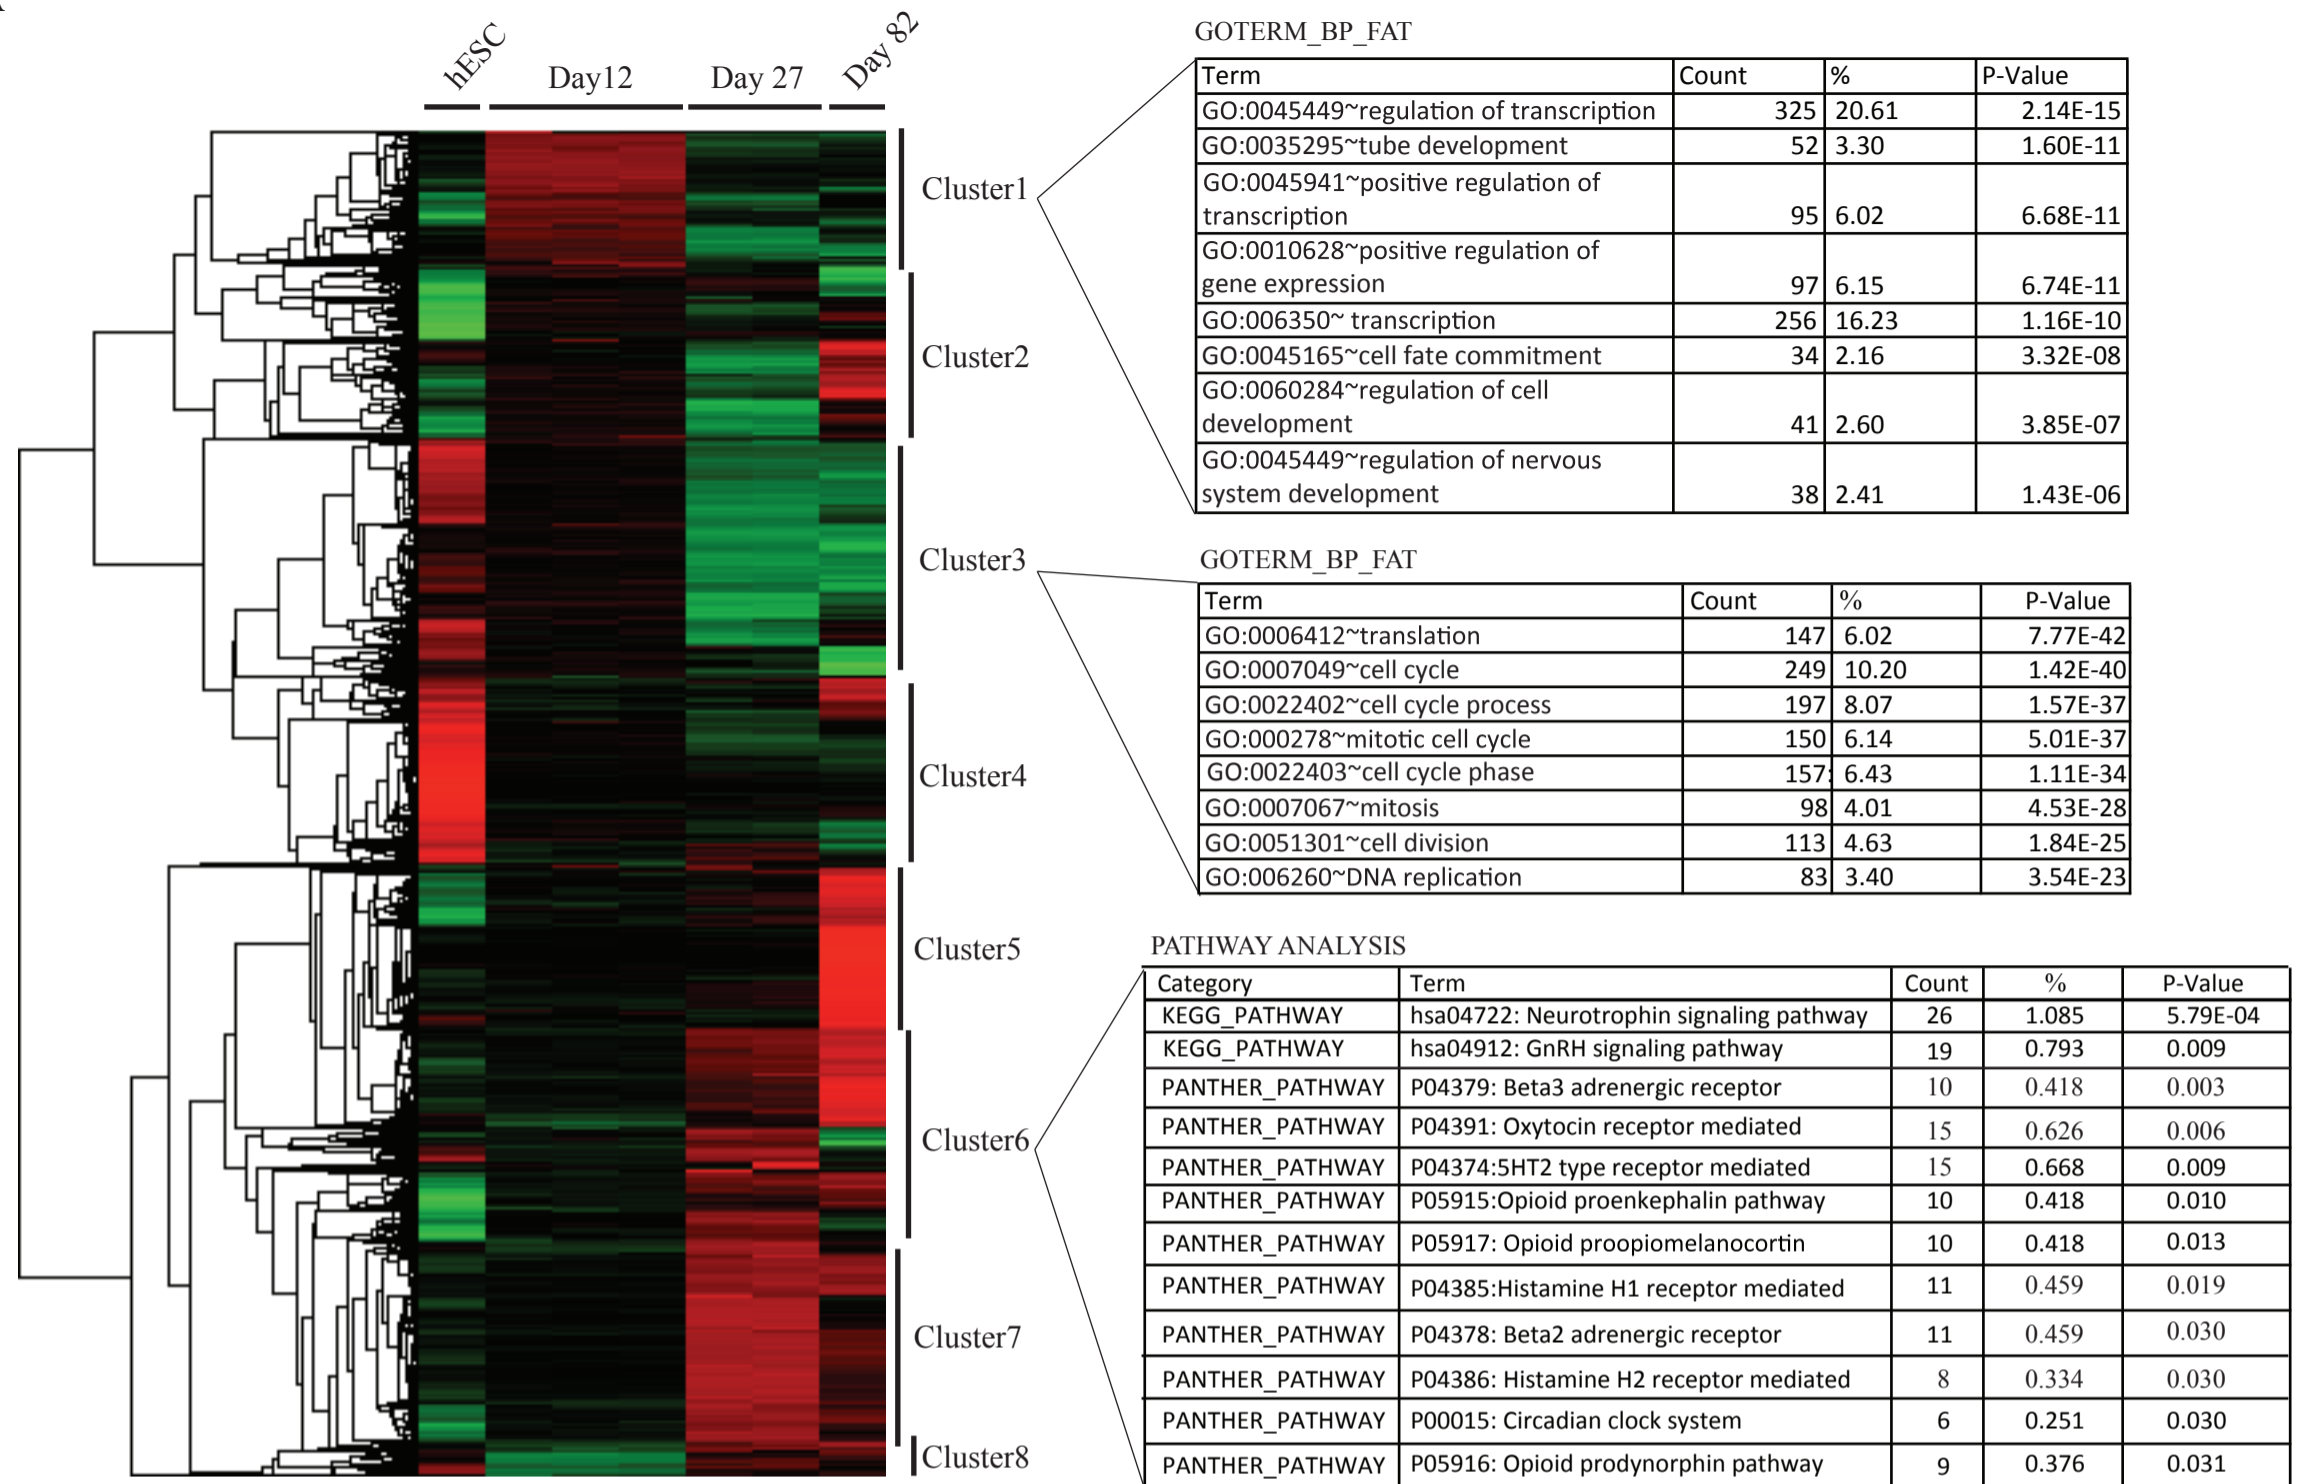

B

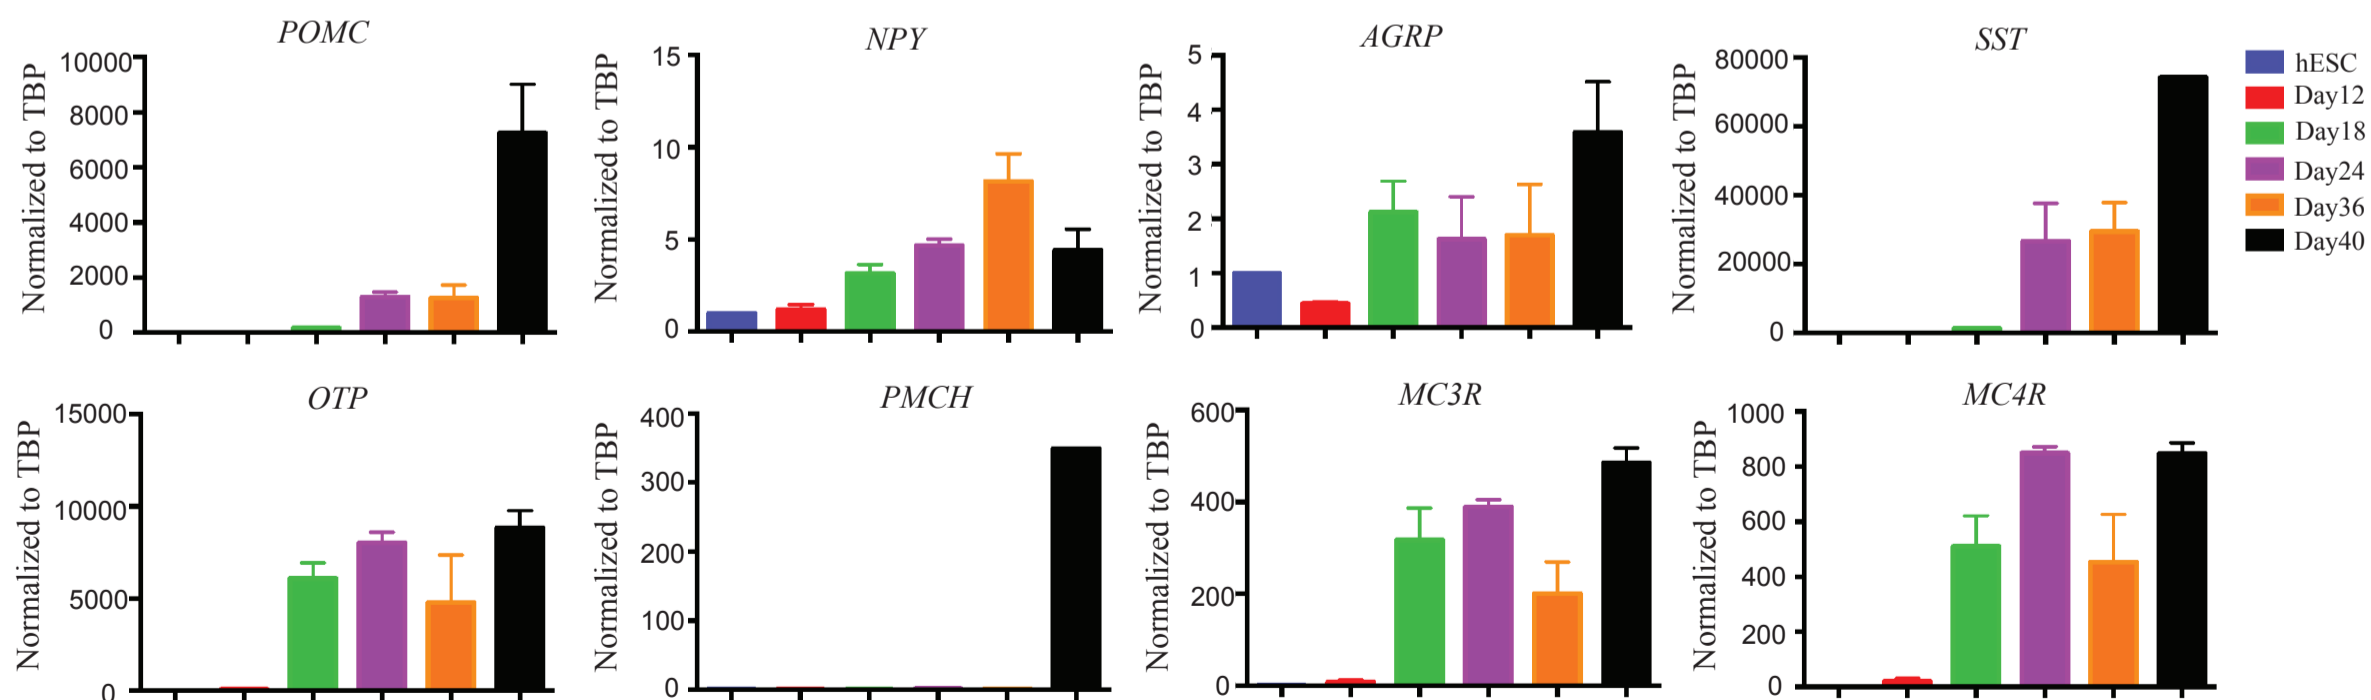

**Figure S5. RNA sequencing of differentiated neurons reveals hypothalamic gene signatures.**

(A) Heatmap from hierarchical clustering analysis of RNA sequencing results from undifferentiated hESC; day12 neuron progenitors; days 27 and 82 of neuronal differentiation. Gene Ontology and pathway analysis were performed for genes in eight major clusters defined by the gene expression patterns according to all samples. Data are shown for Gene Ontology results for clusters 1 (highly expressed in day 12 progenitor cells) and 3 (highly expressed in hESCs), and pathway analysis for the top hits in cluster 6 (highly expressed in differentiated neurons); (B) Temporal expression of hypothalamic transcripts during *Nkx2.1* GFP/W-hESC neuronal differentiation. qPCR analysis of RNA samples from hESC, and cells at 12, 18, 24, 36 and 40 days of neuronal differentiation. N=3 for each bar.

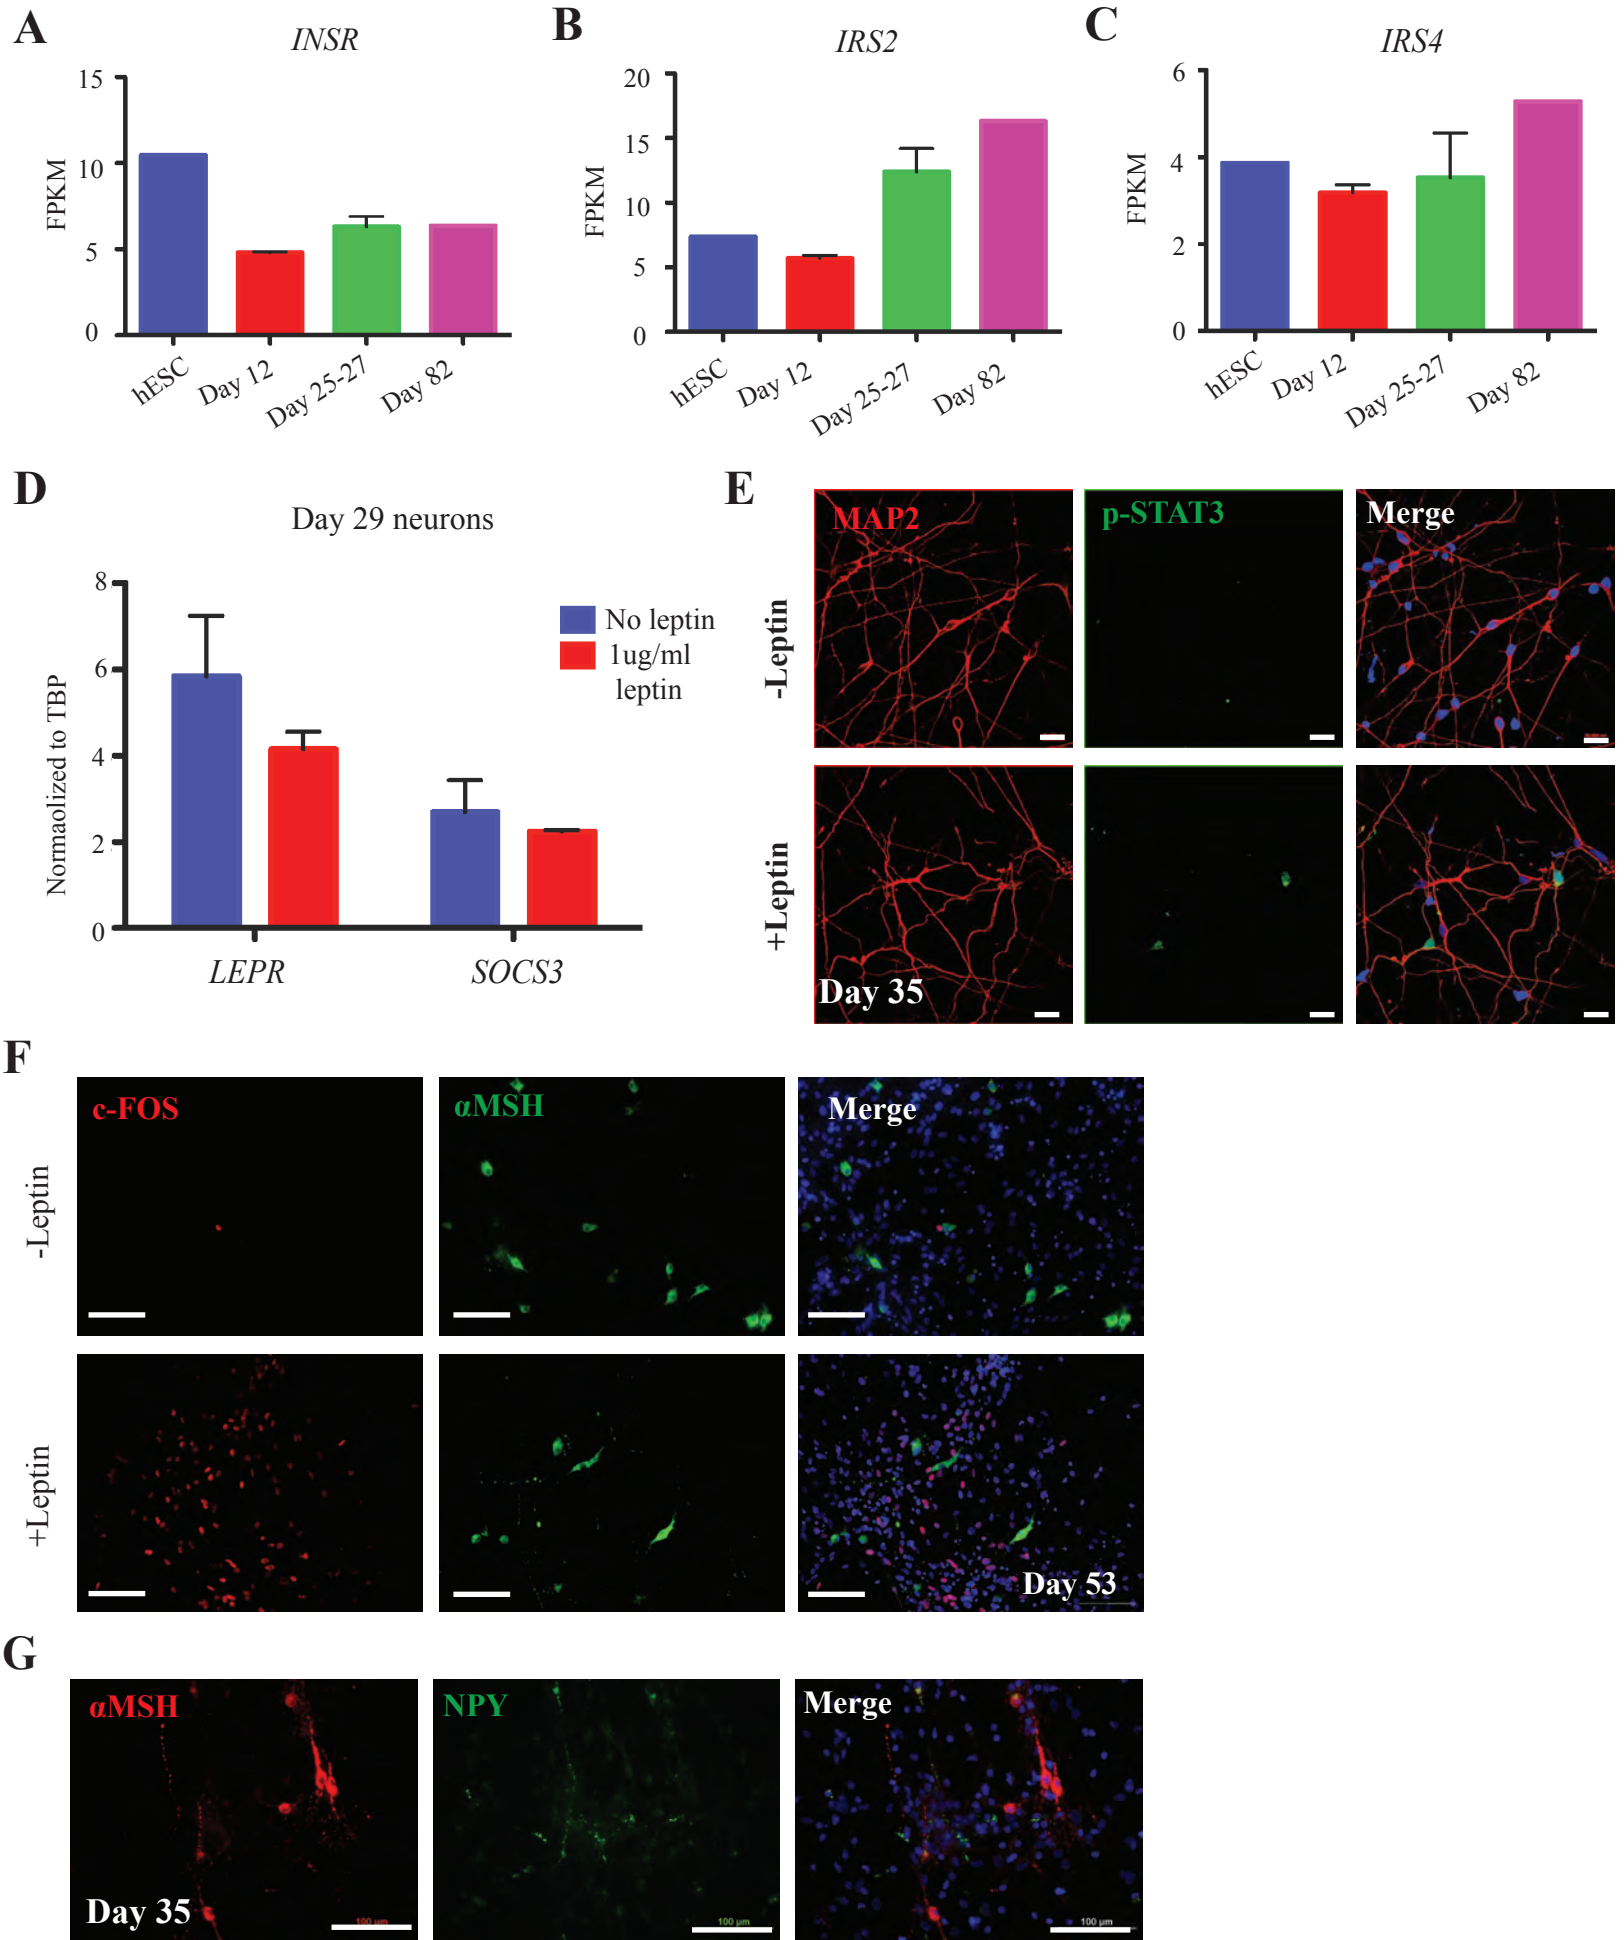

**Figure S6. Mouse cortical astrocyte co-culture induces leptin responsiveness of differentiated hypothalamic neurons.**

(A-C) RNA-seq data for insulin signaling molecules *INSR*, *IRS2* and *IRS4* expression in hESC, 12 (n=3), 25-27 (n=3) and 82 days of differentiated cells; (D) qPCR analysis of *LEPR* and *SOCS3* in leptin-treated day 29 differentiated neurons (n=3); (E) Immunostaining for p-STAT3 and MAP2 in leptin treated day 35 neurons. Scale bar, 20µm; (F) Immunocytochemical analysis for c-FOS and  $\alpha$ MSH in day 53 hESC-derived hypothalamic neurons co-cultured with mouse astrocytes. Scale bar, 100µm; (G) Immunostaining of  $\alpha$ MSH and NPY in day 35 mouse astrocyte co-cultured neurons. Scale bar, 100µm.



A

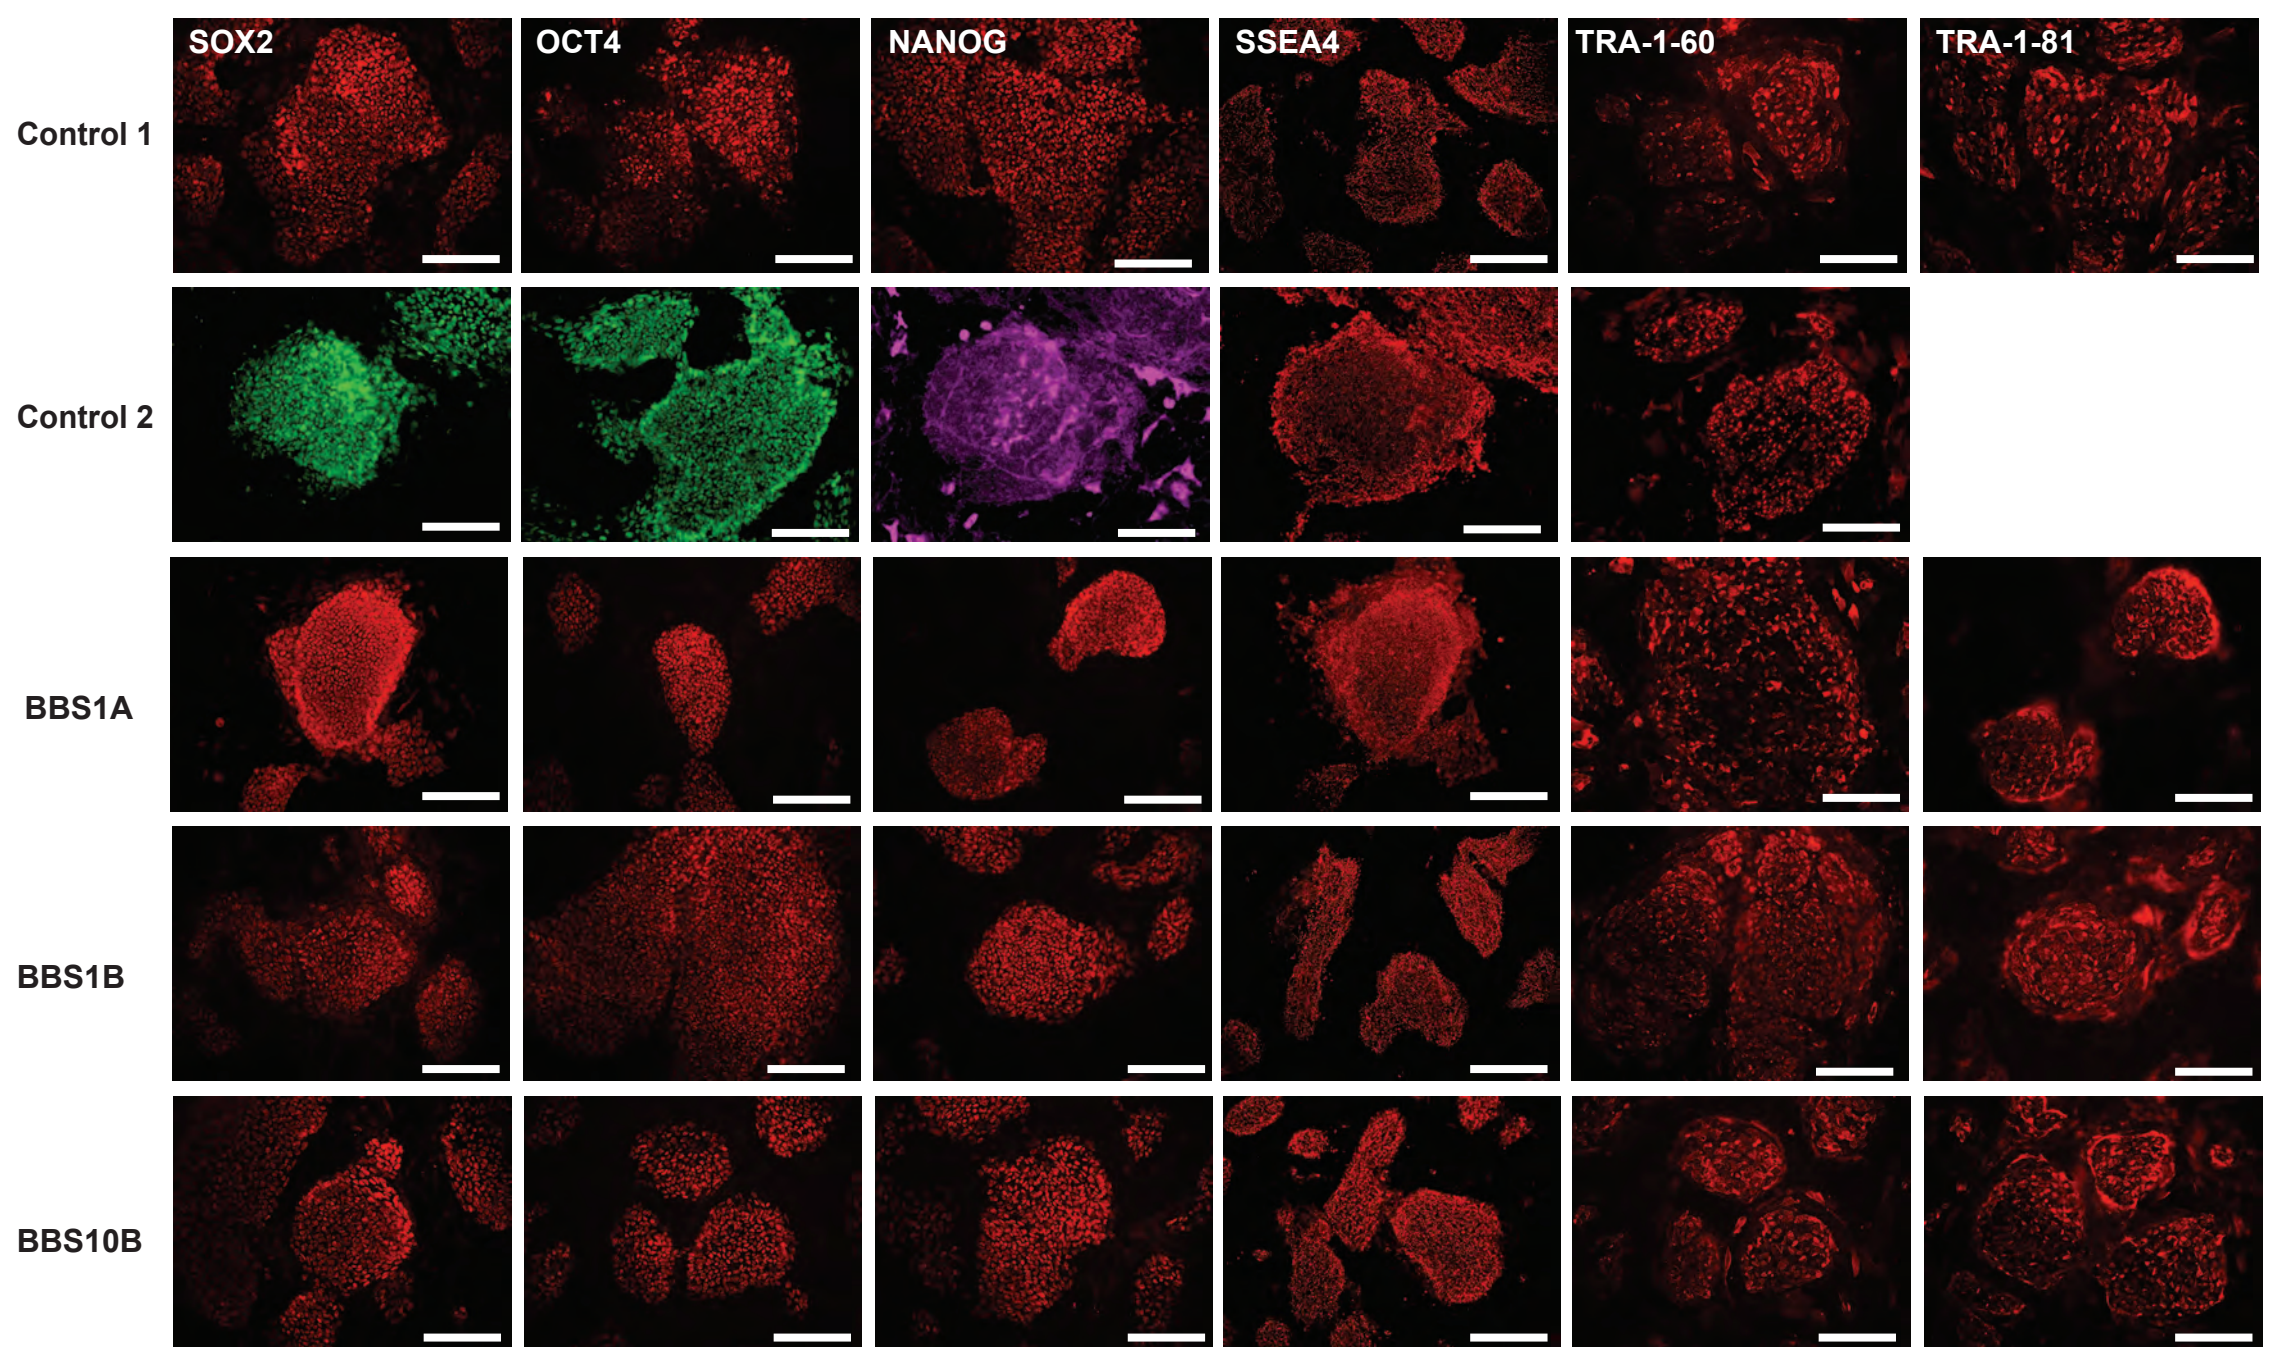

B

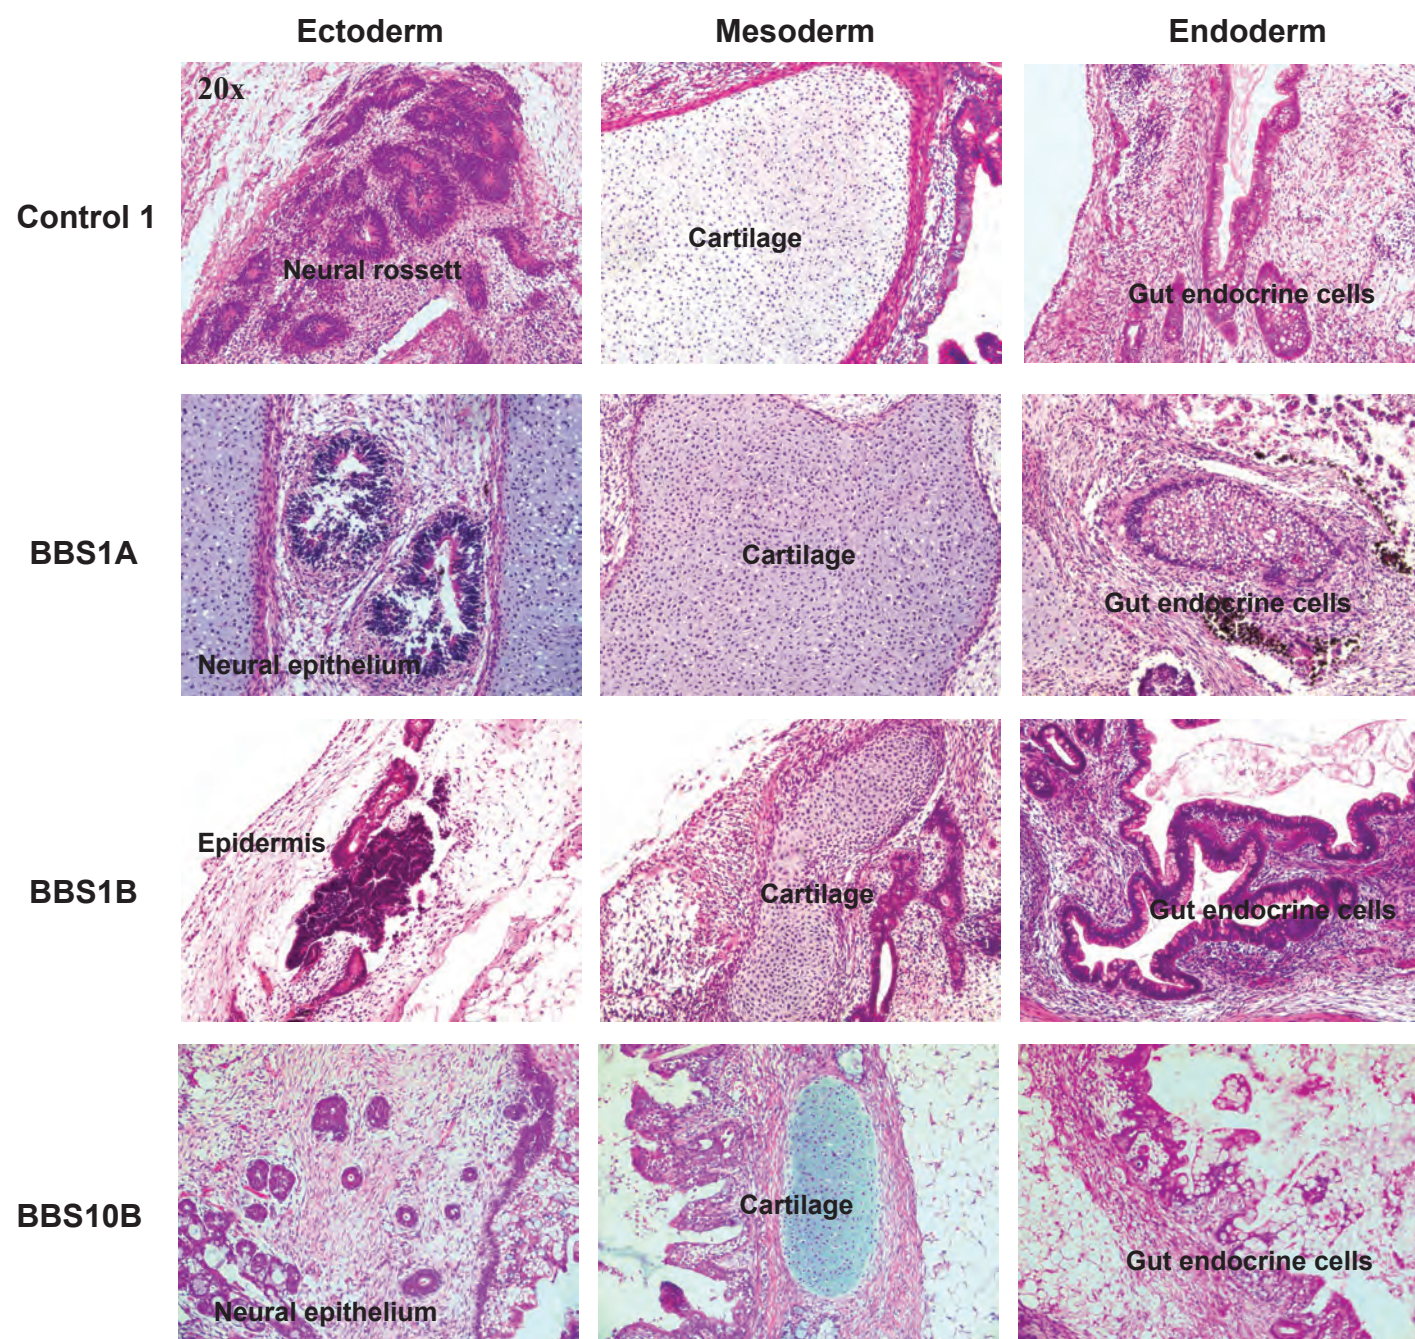

C

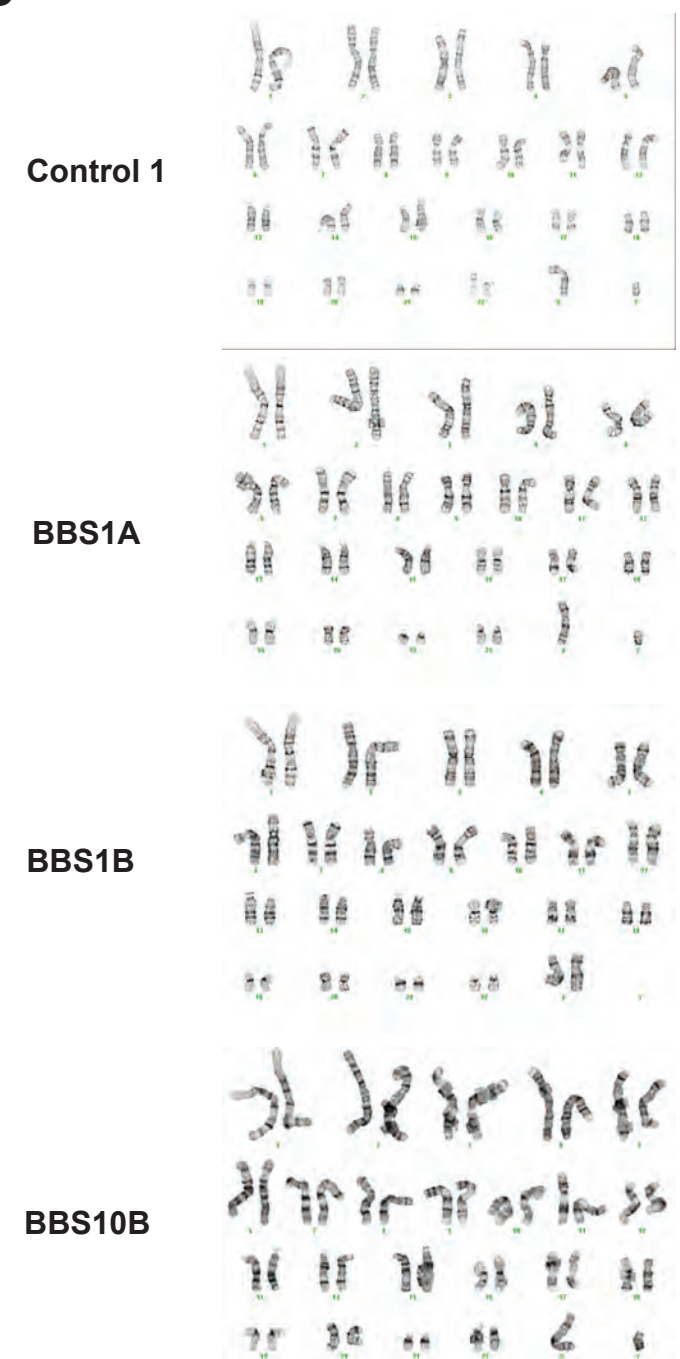

**Figure S7. All control and BBS iPSCs are pluripotent and have normal karyotypes.**

(A) Immunocytochemistry analysis of two control (Control 1, Control 2) and three BBS (BBS1A, BBS1B, BBS10B) iPSCs with pluripotency markers as indicated. Scale bar, 200 $\mu$ m; (B) H&E staining of control and BBS iPSC-derived teratoma sections. We identified cell types representing all three germ layers in all iPSC-derived teratomas; Images were taken with 20x objective lens; (C) Karyotyping of control and BBS iPSC lines. All of these lines had normal karyotypes.

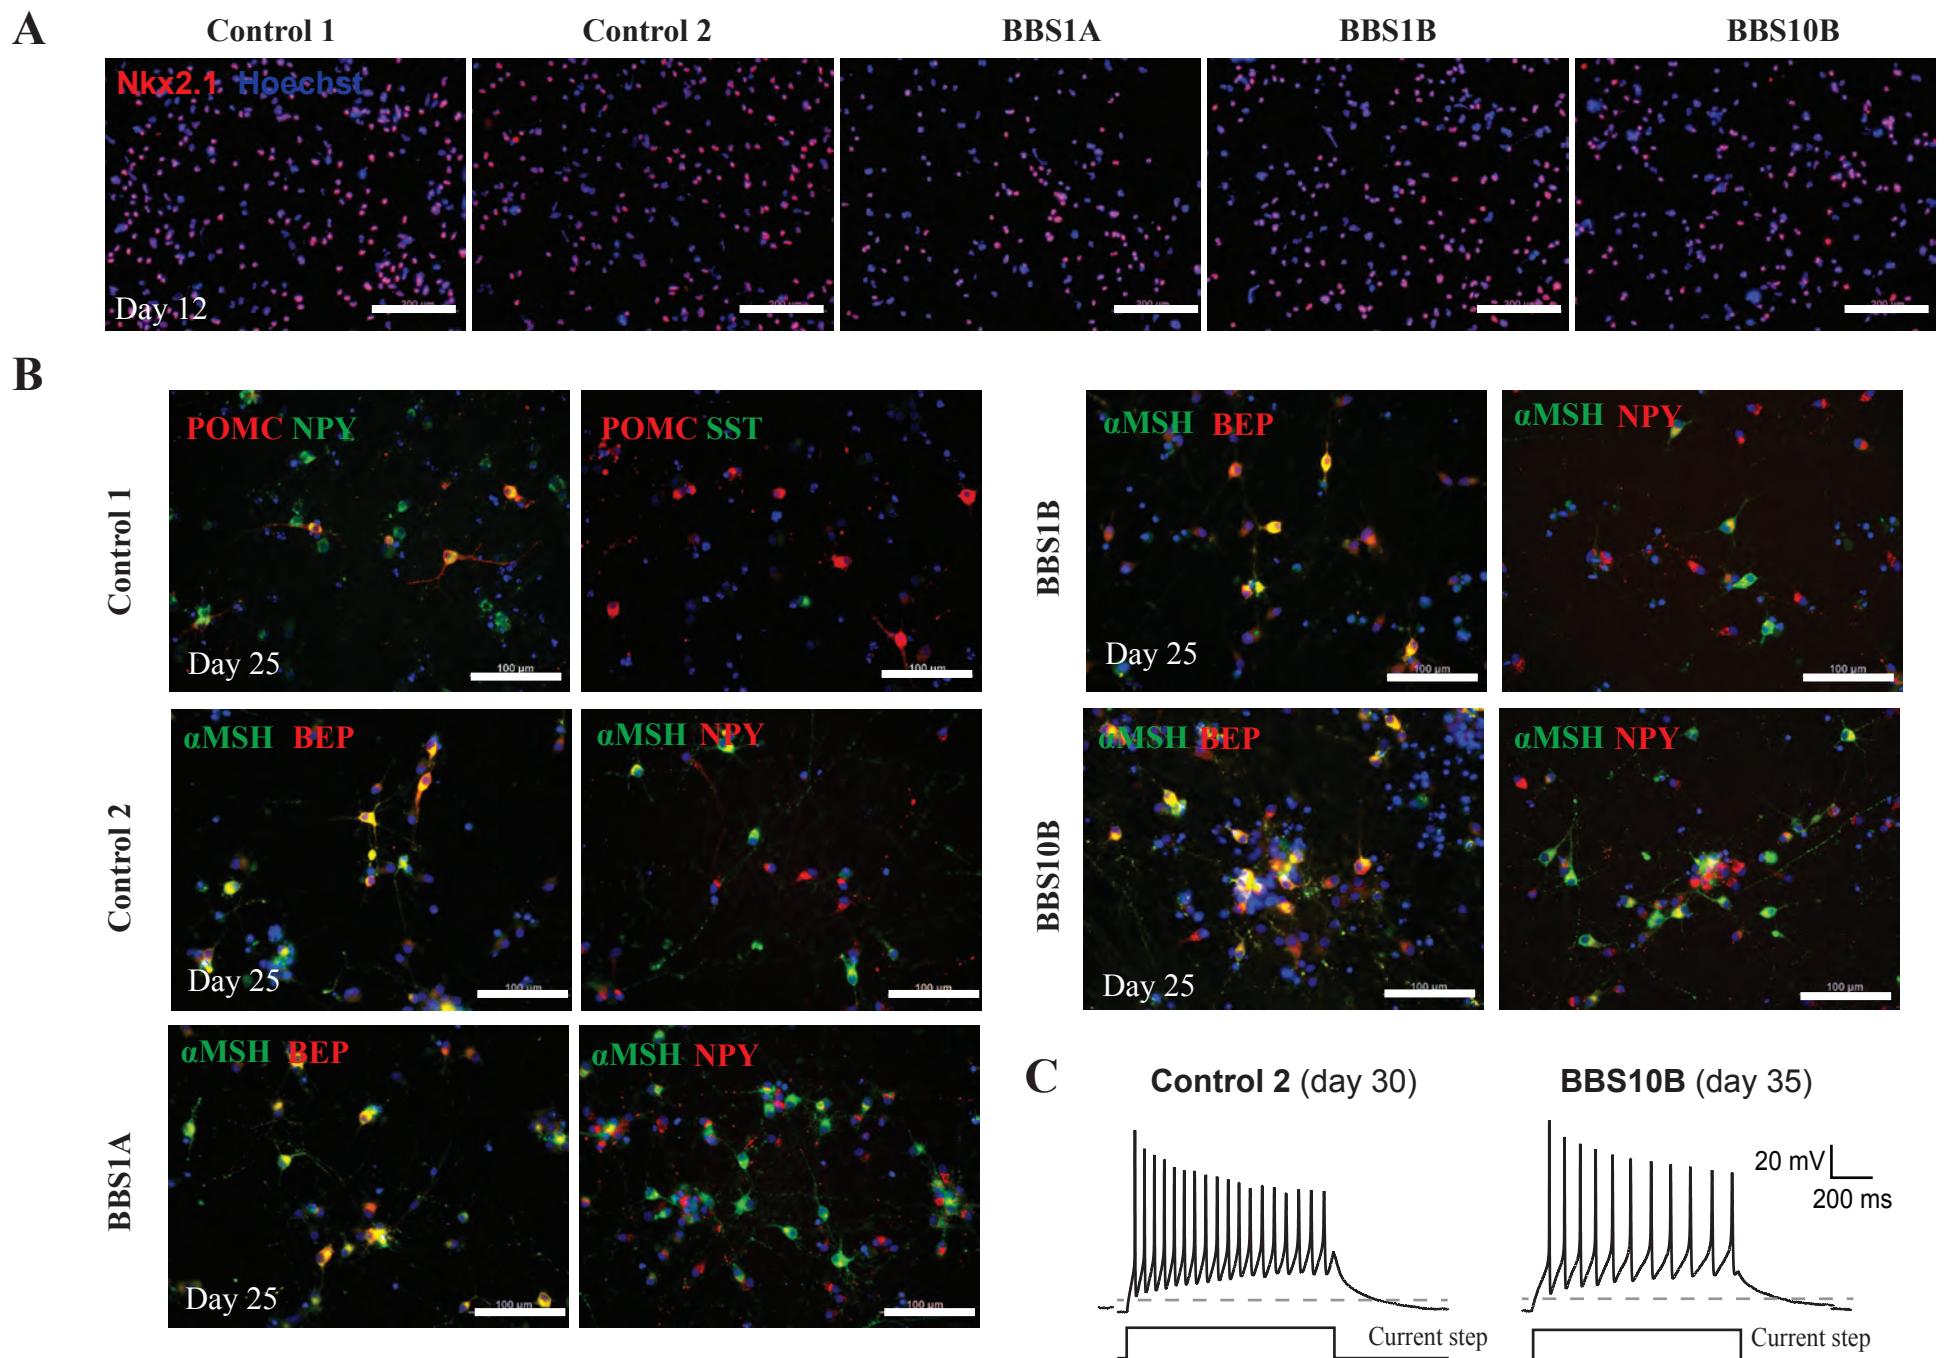

**Figure S8. Efficient generation of hypothalamic neurons from human iPSCs.**

(A) Immunostaining of NKX2.1 in Day 12 progenitors derived from five independent iPSC lines: Control1, Control 2, BBS1A, BBS1B and BBS10B; Scale bar, 200 $\mu$ m; (B) Immunostaining of day 25 neurons with hypothalamic neuron markers. Scale bar, 100 $\mu$ m; (C) Action potential firing in Control 2 (day 30) and BBS10B (day 35) iPSC-derived neurons. Membrane potential traces in response to a 1s current step, as shown under trace, were recorded. Dashed lined = -60 mV.
